# Supplementary material
Source: PubMed Central journal article supplement (PMC5808882)

**A**

Parvalbumin (PV) mRNA

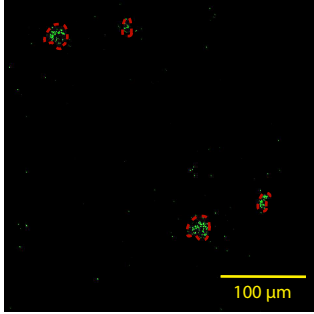

Somatostatin (SST) mRNA

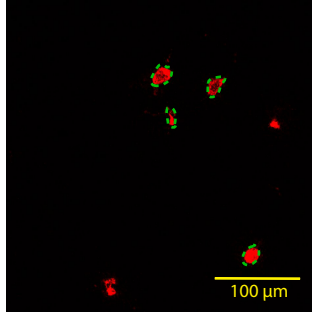

KOR mRNA

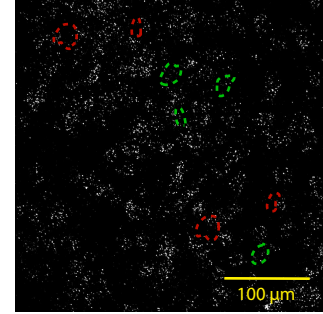

DAPI PV mRNA SST mRNA KOR mRNA

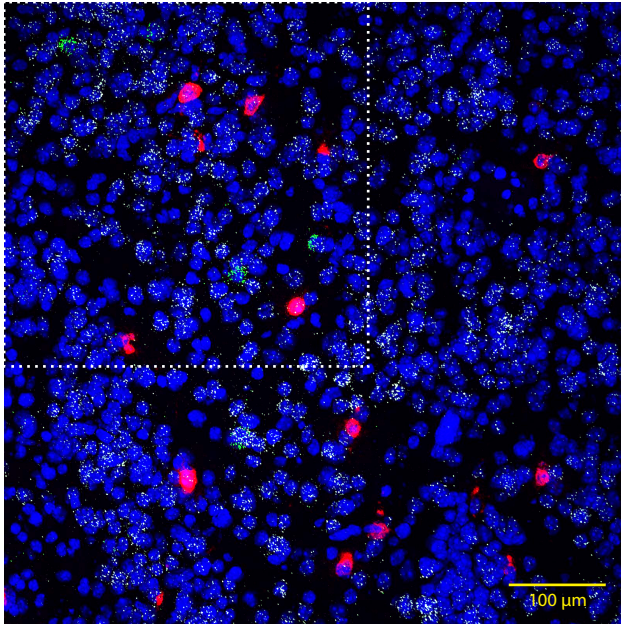

**B**

■ Somatostatin  
■ Parvalbumin

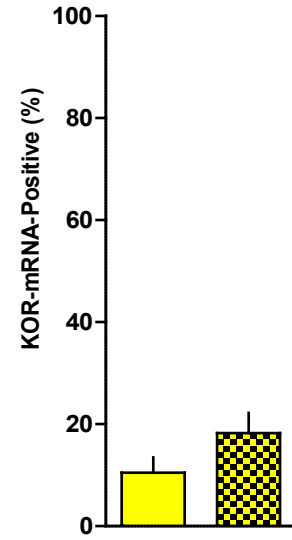

Supplement: NIHMS939615-supplement-Fig_S5.pdf [file NIHMS939615-supplement-Fig_S5.pdf]
