# Supplementary material
Source: PubMed Central journal article supplement (PMC5808882)

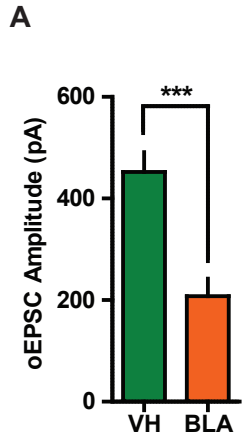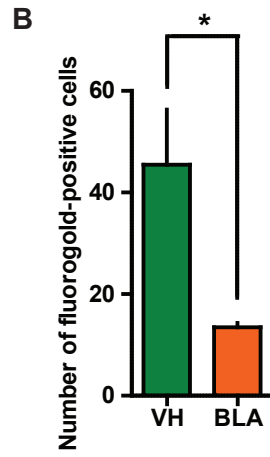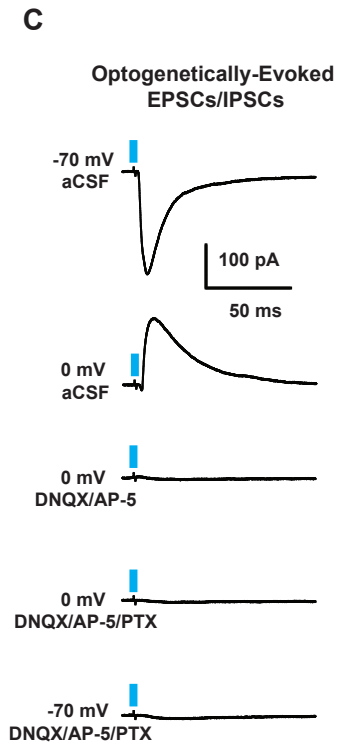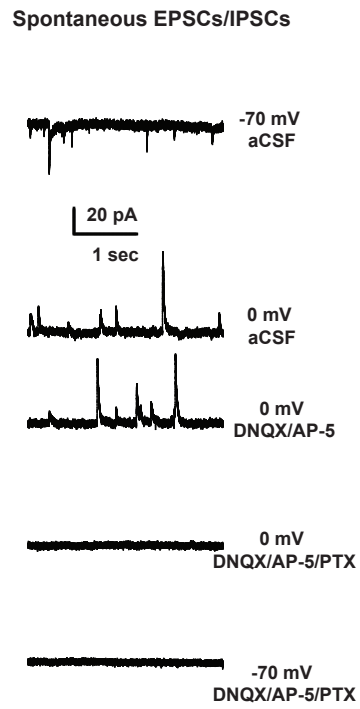

Supplement: NIHMS939615-supplement-FIg_S2.pdf [file NIHMS939615-supplement-FIg_S2.pdf]

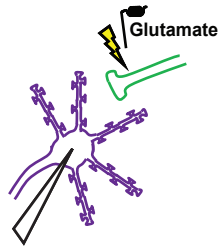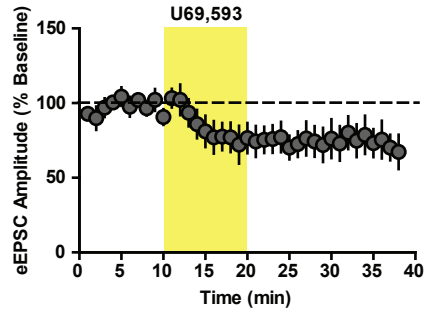

Supplement: NIHMS939615-supplement-Fig_S1.pdf [file NIHMS939615-supplement-Fig_S1.pdf]

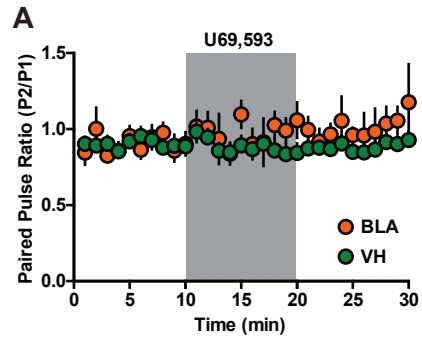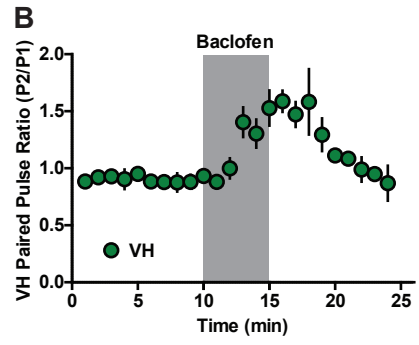

Supplement: NIHMS939615-supplement-Fig_S3.pdf [file NIHMS939615-supplement-Fig_S3.pdf]

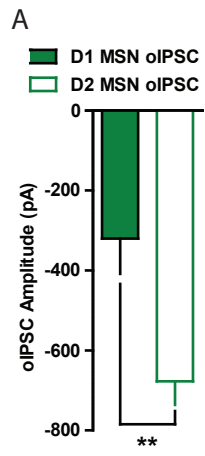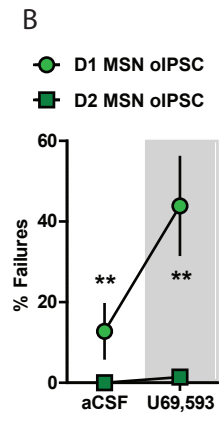

Supplement: NIHMS939615-supplement-Fig_S4.pdf [file NIHMS939615-supplement-Fig_S4.pdf]

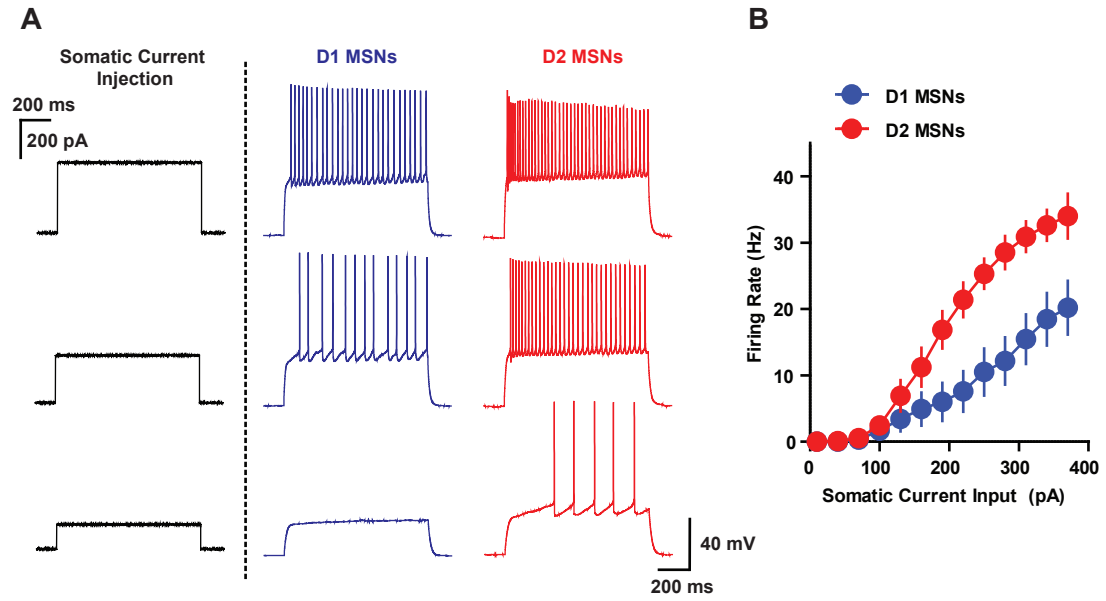

Supplement: NIHMS939615-supplement-Fig_S6.pdf [file NIHMS939615-supplement-Fig_S6.pdf]

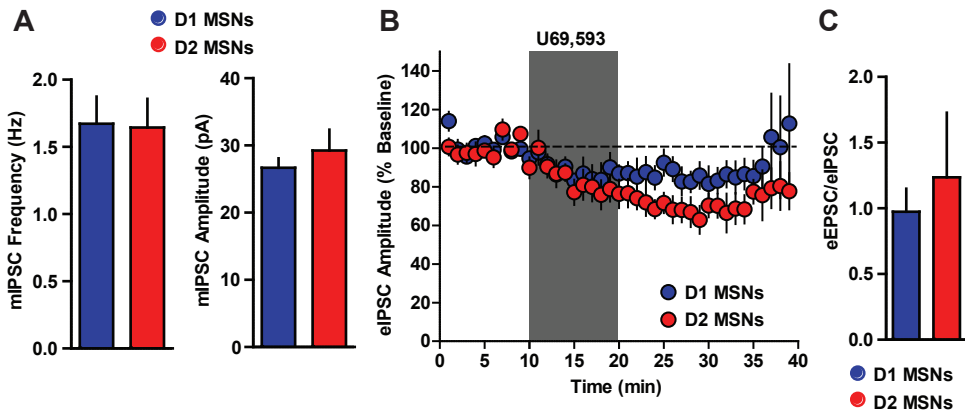

Supplement: NIHMS939615-supplement-Fig_S7.pdf [file NIHMS939615-supplement-Fig_S7.pdf]

### A Electrically-evoked spiking

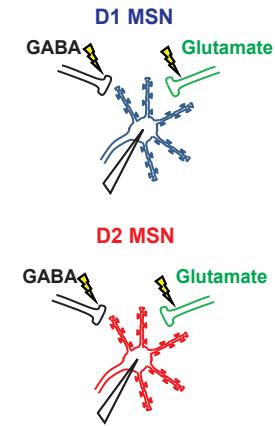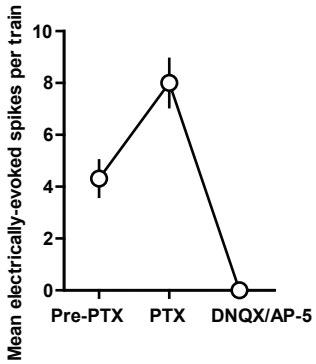

### B

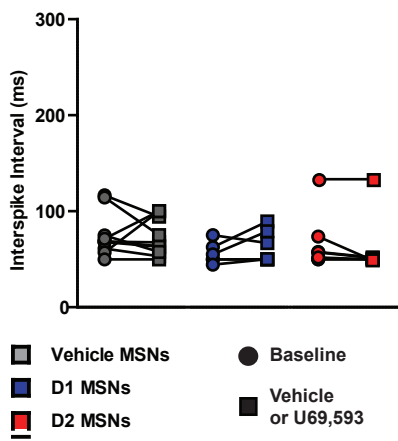

### C

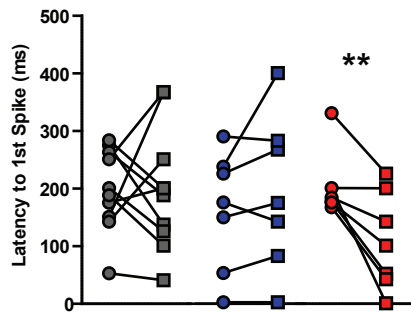

### D BLA-evoked spiking

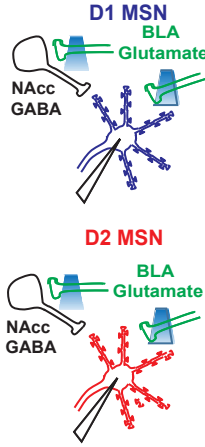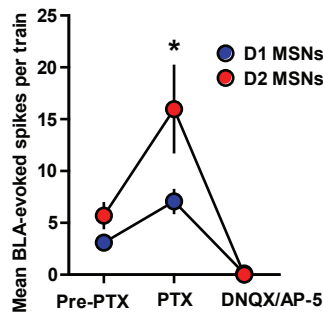

### E

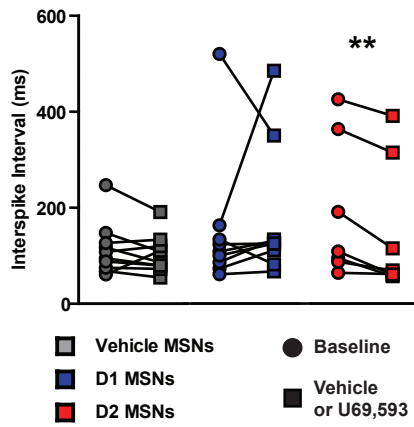

### F

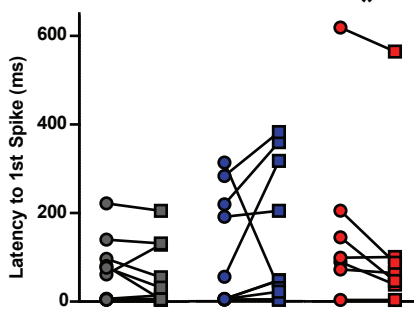

### G VH-evoked spiking

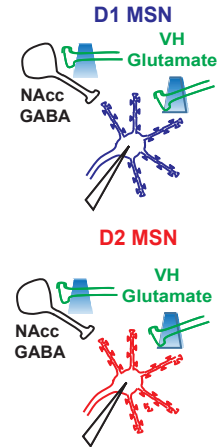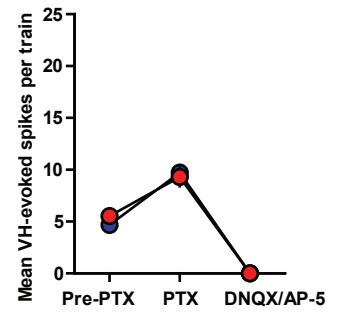

### H

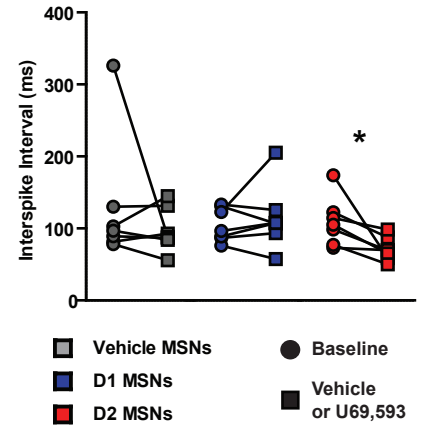

### I

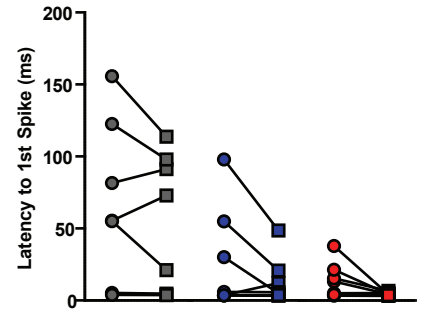

Supplement: NIHMS939615-supplement-Fig_S8.pdf [file NIHMS939615-supplement-Fig_S8.pdf]
